# Supplementary material
Source: publisher figshare collection journal article supplement (https://karger.figshare.com/articles/dataset/_/5125456)
Supplement: Supplementary file 1 [file 1 › 000354158_sm_Table.docx]

**Suppl. table 1.** Clinical, radiological and surgical data of the presented series. Tympanojugularparaganglioma (TJP) patients are reported in gray, vagal paragangliomas (VP) in white and carotid body tumors (CBT) in light gray.

| **Case No.** | **Sex** | **Age (yrs)** | **Prior treatment** | **Side, Tumor(stage)** | **INDICATIONS FOR STENTING**  **1. Angiography and MRI findings**  **2. Clinical findings** | **Year: side, site, type of stent**  **number of stent** | **Surgical approach** | **Operative notes** | **Follow up after stent (mts)**  **RESIDUAL or RECURRENT DISEASE** | **Notes** |
| --- | --- | --- | --- | --- | --- | --- | --- | --- | --- | --- |
| 1 | F | 49 | - | L, TJP  (C3De1) | 1. 360° encasement and stenosis ofL intrapetrous ICA; poor supply from ICA  2. C3 TJP | 2005:L distal cervical and petrous ICA(Neuroform)  2 stents in series | 2005: L IFTA  TOTAL REMOVAL |  | 54  NO |  |
| 2 | F | 31 | - | L, TJ P  (C3Di1) | 1. 180-360° encasement and stenosis ofL intrapetrous ICA; poor supply from ICA  2. C3 TJP | 2004: L distal cervical (Xpert) and petrous ICA (Neuroform)  2 stents in series | 2005: L IFTA  TOTAL REMOVAL |  | 63  NO |  |
| 3 | M | 55 | - | L, TJP  (C3Di1) | 1. 360° encasementof L intrapetrous ICA; poor supply from ICA  2. C3 TJP | 2005: L petrous and precavernousICA (Wingspan )  2 stents in series | 2006: LIFTA  PLANNED SUBTOTAL REMOVAL(intradural extension) |  | 63  RESIDUE IN PF | Stable  (last MRI 2010) |
| 4 | M | 34 | - | L, TJP  (C3Di2) | 1. 180° encasement and stenosis ofL intrapetrous ICA; incompetent circle of Willis; poor supply from ICA  2. C3 TJP | 2010: L distal cervical and petrous ICA (Astron)  2 stents in series | 2010: L IFTA  PLANNED SUBTOTAL REMOVAL(large intradural extension)  2011: L TCh  PLANNED SUBTOTAL REMOVAL (cavernous sinus invasion) |  | 30  RESIDUE IN CAVERNOUS SINUS | RT (2011)stable  (last MRI 2012) |
| 5 | M | 37 | - | L, TJP  (C3Di1) | 1. 360° encasement and stenosis ofL intrapetrous ICA; poor supply from ICA  2. C3 TJP | 2010 : L petrous (Astron) | 2010: L IFTA  TOTAL REMOVAL |  | 30  RECURRENCE IN HYPOGLOSSAL CANAL | Revision IFTA (2012)  Total removal |
| 6 | F | 40 | IFTA for R TJP (C4Di2); planned subtotal removal; intradural and cavernous sinus residue (1997)  POTS for R TJP (C4Di2) Subtotal removal;cavernous sinus residue (1998)  Gamma knife for cavernous sinus residue (1998) | R, TJP recurrence  (C3) | 1.180-360° encasement and stenosisofRintrapetrous ICA; incompetent circle of Willis; poor supply from ICA  2. C3 TJP; PREVIOUS ICA MANIPULATION | 2003: R petrous and distal cervical ICA (Xpert)  2 stents in series | 2004: R IFTA (revision)  PLANNED SUBTOTAL REMOVAL (large intradural extension)  2005: R POTS (revision) resection of occipital condyle  PLANNED SUBTOTAL REMOVAL  (cavernous sinus invasion) |  | 80  RESIDUE IN CAVERNOUS SINUS | RT (1998)MRI negative for residual disease  (last MRI 2011) |
| 7 | M | 39 | IFTA for L TJP (C2DiVie) planned subtotal removal, intradural and vertebral residue (1994)  EL for L TJP intradural and vertebral residue after VA occlusion (1995)  Total removal | L, TJP recurrence  (C3Di1) | 1. 180° encasement and stenosis ofL intrapetrous ICA; incompetent circle of Willis; poor supply from ICA  2. PREVIOUS ICA MANIPULATION | 2004: L petrous and distal cervical ICA (Xpert)  2 stents in series | 2004: L IFTA (revision)  SUBTOTAL REMOVAL(intraduralresidue) | Severe bleeding from tumor at foramen magnum | 81  RESIDUE IN PF | RT (2004)Stable  (last MRI 2011) |
| 8 | M | 39 | IFTA for LTJP (C3Di2) and CBT (Shamblin I); planned subtotal removal of extradural part (1994)  POTS for removal of intradural part; total removal (1995) | L,TJP recurrence  (C3Di2) | 1. 180-360° encasement and stenosis ofL intrapetrous ICA  2. C3 TJP; PREVIOUS ICA MANIPULATION | 2006: L petrous (2 Xpert) and distal cervical ICA (Neuroform)  3 stents in series | 2006: L IFTA (revision)PLANNED SUBTOTAL REMOVAL(intradural extension)  2008: EL SUBTOTAL REMOVAL (residue on intradural VA) | Intradural VA and brainstem residue after second stage | 58  RESIDUE IN PF (intradural VA) | Stable  (last MRI 2010) |
| 9 | M | 54 | IFTA for R TJP (C2) with subadventitial ICA dissection (1989) | R, TJP recurrence  (C4) | 1. 360° encasementof R intrapetrous ICA; incompetent circle of Willis; dicrete blood supply from ICA  2. C4TJP; PREVIOUS ICA MANIPULATION | 2006: R petrous and cervical (LEO)  2 stents in series | 2006: R IFTA  SUBTOTAL REMOVAL (residue around petrous ICA ) | Severe pericarotidintraoperative bleeding | 24  RESIDUE IN PETROUSAPEX AND CLIVUS MEDIAL TO ICA | RT (2007) lost to follow up  (last MRI 2007) |
| 10 | M | 35 | TC for R CBT (Shamblin II)  Other Dpt | R,TJP  (C3Di1)  L,TJP  (C2) | 1. 180-360° encasement and encasement ofR intrapetrous and distal cervicalICA;incompetent circle of Willis; poor supply from ICA  2. PREVIOUS ICA MANIPULATION | 2004: R petrous(Xpert) | 2004: R IFTA  PLANNED SUBTOTAL REMOVAL(intradural extension) |  | 68  RESIDUE IN PF | RT for L TJP (2008)reduction of PF residue  (last MRI 2011) |

| 11 | F | 55 | Previous R ICA dissection | L, TJP  (C3 Di2) | 1. 180° encasement ofL intrapetrous ICA; poor blood supply from ICA  2. SINGLE ICA | 2007: L cervical (Xpert) and petrous (Leo)  2 stents in series | 2007: L IFTA  PLANNED SUBTOTAL REMOVAL (intradural extension).  2009: L IFTA SUBTOTAL REMOVAL | Intradural VA and brainstem residue after second stage | 43  RESIDUE IN PF (intradural VA and brainstem) | RT (2010) stable  (last MRI 2012) |
| --- | --- | --- | --- | --- | --- | --- | --- | --- | --- | --- |
| 12 | M | 40 | TC removal of R CBT (Shamblin II) with ligation of CCA.  Other Dpt | L, TJP (C3De1)  L, VP (Stage I) | 1. 360° encasement ofL intrapetrous ICA; poor blood supply from ICA  2. SINGLE ICA | 2005: L petrous and cervical (Xpert) ICA  2 stents in series | 2005: L IFTA  TOTAL REMOVAL |  | 70  NO |  |
| 13 | M | 33 | R subtotal petrosectomy for TJP  Other Dpt | - R, TJP (C3De1)  - R, VP (Stage I)  - L, TJP (C2)  - L, CBT (Stage I) | 1. 180° encasement and stenosis with suspect parietal invasion of Rdistal cervical ICA; poor blood supply from ICA  2. C3 TJP | 2005: R cervical (Xpert) and petrous (Neuroform)  2 stents in series | 2005: R IFTA  TOTAL REMOVAL (VP and TJP) |  | 64  NO | Sudden deafness following RT for L TJP; CI Lside (2008) |
| 14 | F | 39 | - | - L, TJ P(C3De2)  - L, VP (Stage II)  - R, CBT(Shamblin I) | 1. 180-360° encasement and stenosis of Ldistal cervical ICA;incompetent circle of Willis  2. C3 TJP | 2004: L cervical (Wallstent) | 2004: L IFTA (TJP)  TOTAL REMOVAL  2004: L TC (VP)  TOTAL REMOVAL | Staged surgery for intraoperative CSF leak | 70  NO |  |

| 15 | M | 53 | R extracerebral bypass (failure)  Other Dpt  R TM-TC approach for stage I VP (2000): total removal | 2004: R, VP recurrence  (Stage II) | 1. 2004: 180-360° encasement and stenosis of R cervical ICA; incompetent circle of Willis; poor blood supply from ICA  2. PREVIOUS ICA MANIPULATION | 2004: R cervical (Xpert) | 2004: R TM-TC  TOTAL REMOVAL |  | 80  NO | Malignant VP on histology |
| --- | --- | --- | --- | --- | --- | --- | --- | --- | --- | --- |
| 2007: R, TJP  (C3) | 1. 2007: incompetent circle of Willis; poor blood supply from ICA  2. C3 TJP; PREVIOUS ICA MANIPULATION | 2007: R petrous (Xpert) | 2007:R IFTA  PLANNED SUBTOTAL REMOVAL (cavernous sinus invasion) |  | 44  RESIDUE IN CAVERNOUS SINUS | RT in 2008stable  (last MRI 2011) |
| 16 | M | 51 | - | BilateralVP  (Stage I) | 1.360° encasement of L cervical ICA; encasement < 180° and stenosis of Rcervical ICA; poor blood supply from ICA  2.BILATERAL ICA ENCASEMENT | 2003: L cervical (Wallstent) | 2003: L TM-TC  SUBTOTAL REMOVAL (Residue on XIICN to spare nerve function) | ICA fissure at superior stent margin during dissection | 24  RESIDUE ON XII | Bilateral XII nerve palsy  MRI negative for residual disease  Lost to follow up  (last MRI 2005) |
| 17 | F | 56 | - | L, VP  (Stage I) | 1. 180-360° encasement and stenosis ofLdistal cervical ICA; incompetent circle of Willis; poor blood supply from ICA | 2004: L cervical (Xpert) | 2004: L TC  TOTAL REMOVAL |  | 73  NO |  |
| 18 | F | 37 | - | R, VP  (Stage I) | 1. 180-360° encasement and stenosisof R cervical ICA; incompetent circle of Willis; poor blood supply from ICA | 2004:R cervical(Xpert) | 2004: R TC  TOTAL REMOVAL |  | 76  NO |  |

| 19 | F | 35 |  | Bilateral CBTs (Shamblin III) | 1. 360° encasement bilateral cervical ICAs  2. BILATERAL SHAMBLIN III CBT | 2008: L cervical (Wallstent)  2009: R cervical (Wallstent) | 2008: L TC  TOTAL REMOVAL  2009: R TC  TOTAL REMOVAL |  | 36  NO | Baroreceptor failure syndrome, controlled with medical therapy |
| --- | --- | --- | --- | --- | --- | --- | --- | --- | --- | --- |

**Table legend:** CI: cochlear implant; Dpt: department; EL: extreme lateral approach; F: female; ICA: internal carotid artery; IFTA: infratemporal fossa approach type A; L: left; M: male; MRI: magnetic resonance imaging; PF: posterior fossa; POTS: petro-occipital-trans-sigmoid approach; R: right; TC: transcervical approach; TCh: transcochlear approach; TM-TC: transmastoid-transcervical approach; RT: radiotherapy.
